# Supplementary material
Source: HighWire-hosted journal article supplement (https://erj.ersjournals.com/content/50/3/1700995)
Supplement: inline-supplementary-material-1 [file inline-supplementary-material-1.pdf]

## ONLINE SUPPLEMENT

### MATERIALS AND METHODS

**Table S1: List of primary antibodies, their source and working dilutions**

| <b>Antibody</b> | <b>Source</b>                     | <b>Host Species</b> | <b>Working Concentration</b> |
|-----------------|-----------------------------------|---------------------|------------------------------|
| FSP             | Abcam (UK)                        | Mouse               | 1:500                        |
| P75             | Advanced Targetting Systems (USA) | Mouse               | 1:100                        |
| HNK1            | Sigma (UK)                        | Mouse               | 1:100                        |
| AP2 $\alpha$    | Novus Biologicals (USA)           | Rabbit              | 1:50                         |
| PGP9.5          | Cedarlane (Canada)                | Mouse               | 1:250                        |
| Synaptophysin   | Dako (UK)                         | Rabbit              | 1:50 (Pre-diluted)           |
| SP              | In house (Eedy et al., 91)        | Rabbit              | 1:1000                       |
| CGRP            | Peninsula (USA)                   | Rabbit              | 1:900                        |
| TRPA1           | Abcam (UK)                        | Rabbit              | 1:100                        |
| TRPV1           | Abnova (Taiwan)                   | Mouse               | 1:100                        |

## **Harvesting total RNA**

RNA was extracted from each sample (1 well) using the Picopure RNA Isolation kit as follows: culture medium was removed from PNE cultures and cells were washed with ice cold PBS for 5 minutes. Extraction buffer (100  $\mu$ l) was then added and samples were incubated at 42°C for 30 minutes. Each sample was mixed gently using a pipette tip and collected in a microcentrifuge tube.

RNA purification columns were preconditioned by adding conditioning buffer (250  $\mu$ l) to each column membrane. Membranes were incubated with the conditioning buffer for 5 minutes at room temperature. Columns were then centrifuged at high speed for 1 minute to remove buffer.

70% ethanol (100  $\mu$ l) was added to each microcentrifuge containing the cell extract and samples were mixed gently by pipetting. The mixture was transferred to a preconditioned RNA purification column and RNA was bound to the column by centrifuging the column at low speed for 2 minutes. Flowthrough was removed by centrifuging the column at high speed for 30 seconds. Wash buffer 1 (100  $\mu$ l) was added to each column and centrifuged for 1 minute at 8,000 x g. Wash buffer 2 (100  $\mu$ l) was then added to each column and samples were centrifuged for 1 minute at 8,000 x g. A second aliquot of wash buffer 2 (100  $\mu$ l) was added to each column and centrifuged at high speed for 2 minutes. The purification column was then transferred to a collection tube and elution buffer (11  $\mu$ l) was applied directly to the column membrane. Membranes were incubated with elution buffer for 1 minute at room temperature before being centrifuged for 1 minute at 1000 x g to ensure complete coverage of the membrane with the buffer. RNA was then eluted by centrifuging for 1 minute at high speed.

RNA was quantified using 2  $\mu$ l of cDNA solution on a Take3 plate. Absorbance readings at 260 nm and 280 nm were obtained along with a 260/280 ratio and the concentration of RNA per  $\mu$ l.

**S2: TaqMan primer details**

| <b>Gene</b> | <b>Reference No.</b> | <b>Chromosome No.</b> | <b>Probe sits on exon boundary</b> | <b>Base position</b> | <b>Amplicon length</b> |
|-------------|----------------------|-----------------------|------------------------------------|----------------------|------------------------|
| TRPA1       | HS00175798           | 8                     | 2 - 3                              | 441                  | 124                    |
| TRPV1       | HS00218912           | 17                    | 8 - 9                              | 1540                 | 94                     |
| B2M         | HS00984230           | 15                    | 3 - 4                              | 431                  | 81                     |
| GUSB        | HS00939627           | 7                     | 8 - 9                              | 1522                 | 96                     |

**Table S3: Thermal profile for qPCR**

| <b>Segment</b> | <b>Thermal profile</b>                 | <b>Cycles</b> |
|----------------|----------------------------------------|---------------|
| 1              | 2 minutes at 55°C                      | 1             |
| 2              | 10 minutes at 95°C                     | 1             |
| 3              | 15 seconds at 95°C<br>1 minute at 60°C | 45            |

## **Microfluorimetric Calcium Imaging**

[Ca<sup>2+</sup>]<sub>i</sub> was measured by alternating excitation wavelengths of 340 and 380 nm light delivered from a dual monochromator (5 nm bandwidth) using a light chopper. Emitted fluorescence was measured from the side port of the microscope via an adjustable rectangular window, a filter (510 nm) and a photomultiplier tube (PMT) in the light path. Fluorescence equipment was controlled by Acquisition Engine software. Background fluorescence was measured at the end of each experiment by exposing the cell to 5 mM MnCl<sub>2</sub> and quenching the fluorescent dye. Changes in the background-corrected fluorescence emitted at each excitation wavelength (R=340/380) was used as a measure of change in cytoplasmic Ca<sup>2+</sup> concentrations.

**Table S4: Cytokine details**

| <b>Cytokine</b> | <b>Source</b>  |
|-----------------|----------------|
| NGF             | Peprtech (USA) |
| TNF $\alpha$    | Sigma (UK)     |
| IL1 $\beta$     | Sigma (UK)     |
| Poly I:C        | Invivogen (UK) |

## RESULTS

**Table S5: The presence of TRPA1 and TRPV1 mRNA in PNEs was confirmed by qPCR**

| Channel | Ct     | Average Ct |
|---------|--------|------------|
| TRPA1   | 25.785 | 25.547     |
|         | 25.865 |            |
|         | 26.055 |            |
|         | 24.755 |            |
|         | 25.275 |            |
| TRPV1   | 34.94  | 34.644     |
|         | 34.415 |            |
|         | 35.155 |            |
|         | 33.935 |            |
|         | 34.775 |            |

## FIGURE LEGENDS

**Figure S1:** hDPSCs express the neural crest stem cell marker P75 (A) and subpopulations of cells express HNK1 (B) and AP2 $\alpha$  (C). Scale bars: 50  $\mu$ m.

**Figure S2:** PNEs express the neuropeptides SP (A) and CGRP (B), a characteristic of sensory neurons. Scale bar 100  $\mu$ m.

**Figure S3:** PNEs displayed spontaneous fluctuations in  $[Ca^{2+}]_i$ . Viability of PNEs was determined through the observation of increases in  $[Ca^{2+}]_i$  in the absence of agonist challenges. Figures A and B are representative traces of the varying degrees of spontaneous activity observed in PNEs.

**Figure S4:** Changes in intracellular  $Ca^{2+}$  levels ( $[Ca^{2+}]_i$ ) in response to capsaicin were investigated in PNEs demonstrating spontaneous activity. Stimulation with capsaicin evoked an instantaneous increase in  $[Ca^{2+}]_i$  levels (A).  $[Ca^{2+}]_i$  fell back to basal levels immediately after peaking. In the presence of the TRPV1 antagonist capsazepine PNEs exhibited an attenuated response to capsaicin compared with cells that had not been exposed to the antagonist (B). The change in absorbance ratio ( $\Delta$ Ratio) was graphed for statistical analysis to show specific TRPV1 activation in PNEs (C). Bars represent SEM, \*  $P < 0.05$ , \*\*  $P < 0.01$ .

**Figure S5:** PNEs demonstrating spontaneous activity were stimulated with cinnamaldehyde and an instantaneous increase in  $[Ca^{2+}]_i$  levels was observed (A).  $[Ca^{2+}]_i$  fell back to basal levels immediately after peaking. In the presence of the TRPA1 antagonist HC030031 PNEs exhibited an attenuated response to cinnamaldehyde compared to cells that had not been exposed to the antagonist (B). The change in absorbance ratio ( $\Delta$ Ratio) was graphed for statistical analysis to show specific TRPA1 activation in PNEs (C). Bars represent SEM, \*  $P < 0.05$ , \*\*  $P < 0.01$ .

**Figure S6:** PNEs were treated with pro-inflammatory cytokines TNF $\alpha$  and IL1 $\beta$  to determine whether the lack of change in TRPA1 gene expression was specific to NGF treated cells. No significant changes in TRPA1 gene expression was observed in PNEs treated with either TNF $\alpha$  or IL1 $\beta$ . Bars represent SEM.

**Figure S7:** PNE TRPV1 channels did not become hyper-responsive following 20 minutes incubation with the pro-inflammatory mediator NGF (100 ng/ml) (A). Similarly there were no significant changes in TRPV1 gene expression following NGF treatment for 6 or 24 hours (B). Bars represent SEM, \*  $P < 0.05$ .



**Figure S8:** Vehicle controls. PNE currents were not altered in response to 0.001% DMSO alone. Currents generated by cinnamaldehyde and capsaicin were included for comparison. Bars represent SEM.

**Figure S9:** PNEs were treated with a range of Poly I:C concentrations (2 µg/ml – 20 µg/ml) in order to determine the optimal working concentration for experiments. IL8 release was used as a measure of response. PNEs treated with 2 µg/ml PolyI:C generated the largest response in terms of IL8 release compared to 10 µg/ml and 20 µg/ml and thus was selected for use in further experiments. Bars represent SEM, \*\*\*  $P < 0.001$ .

## FIGURES

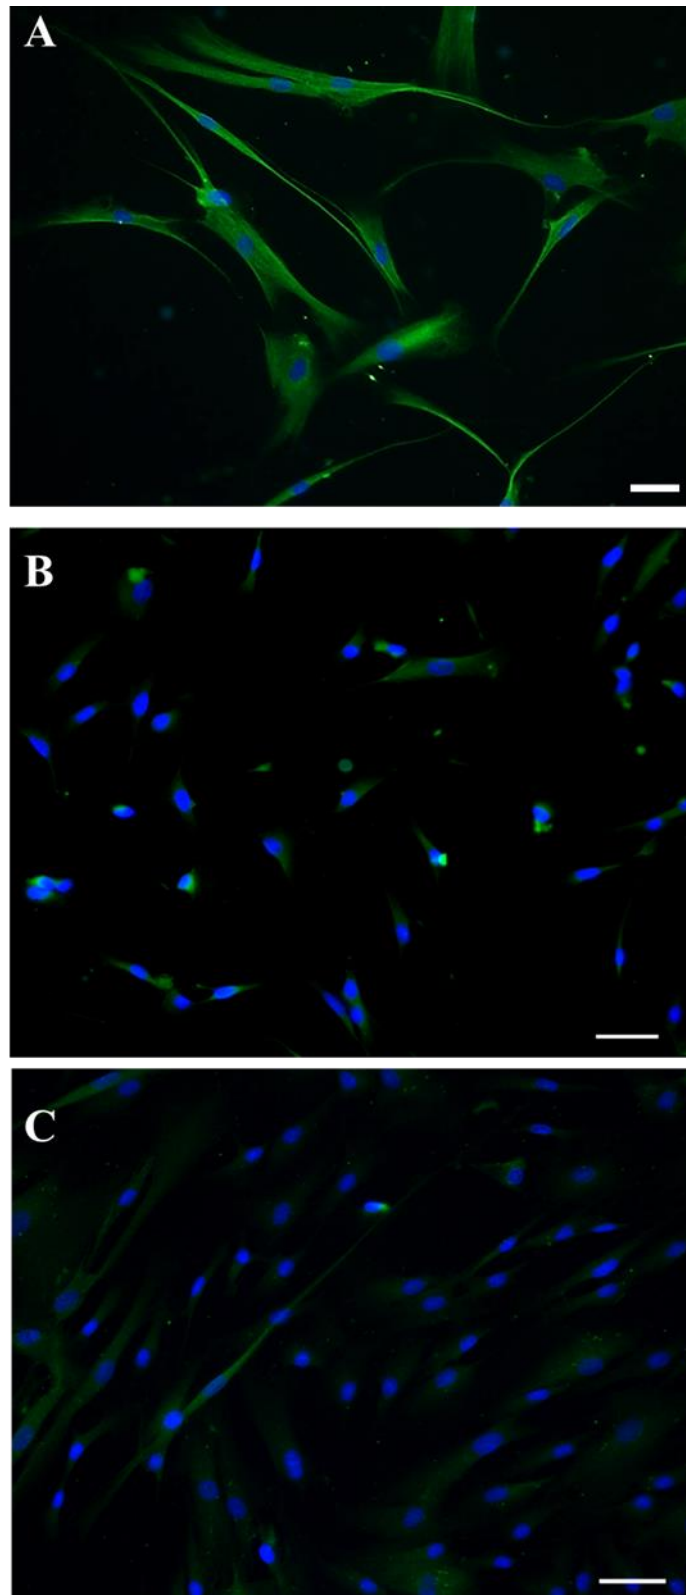

Figure S1

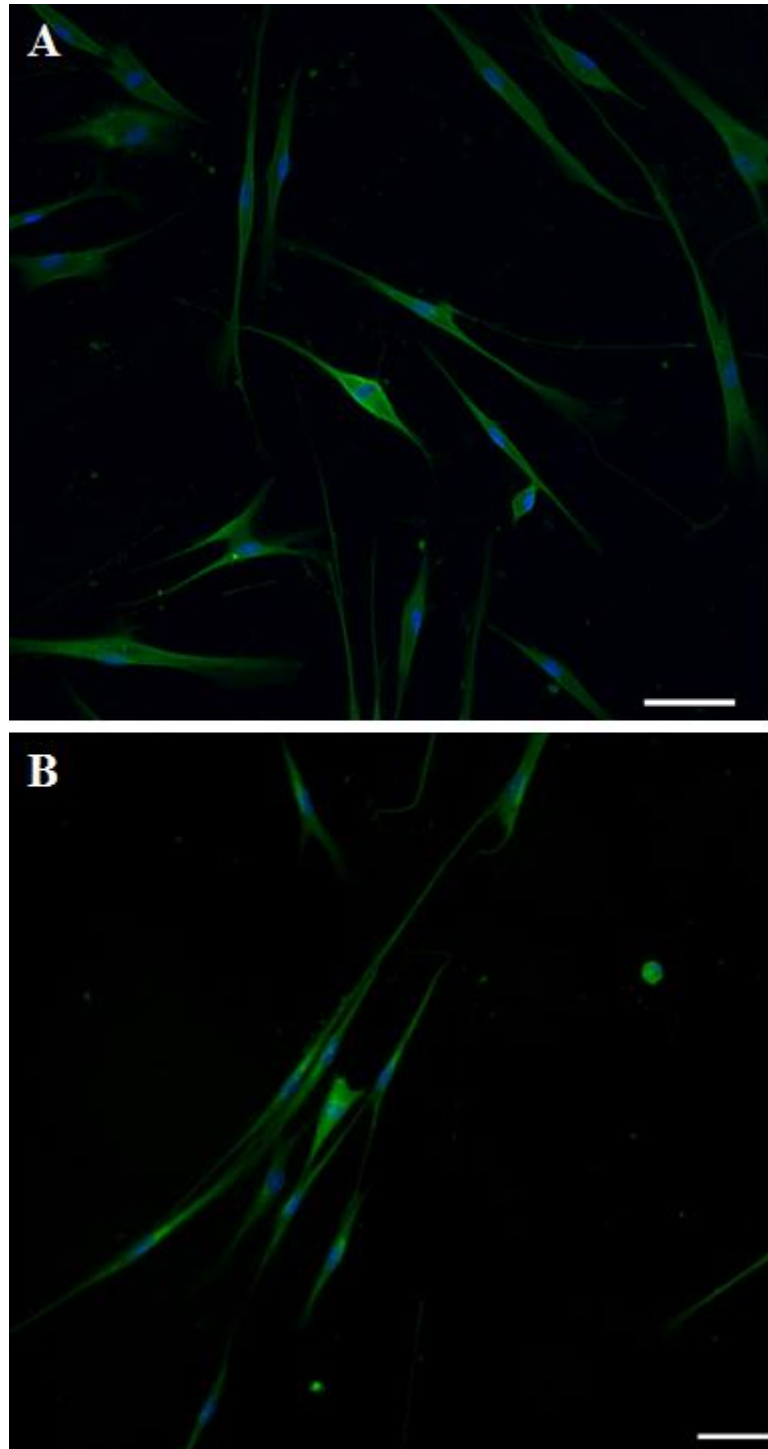

**Figure S2**

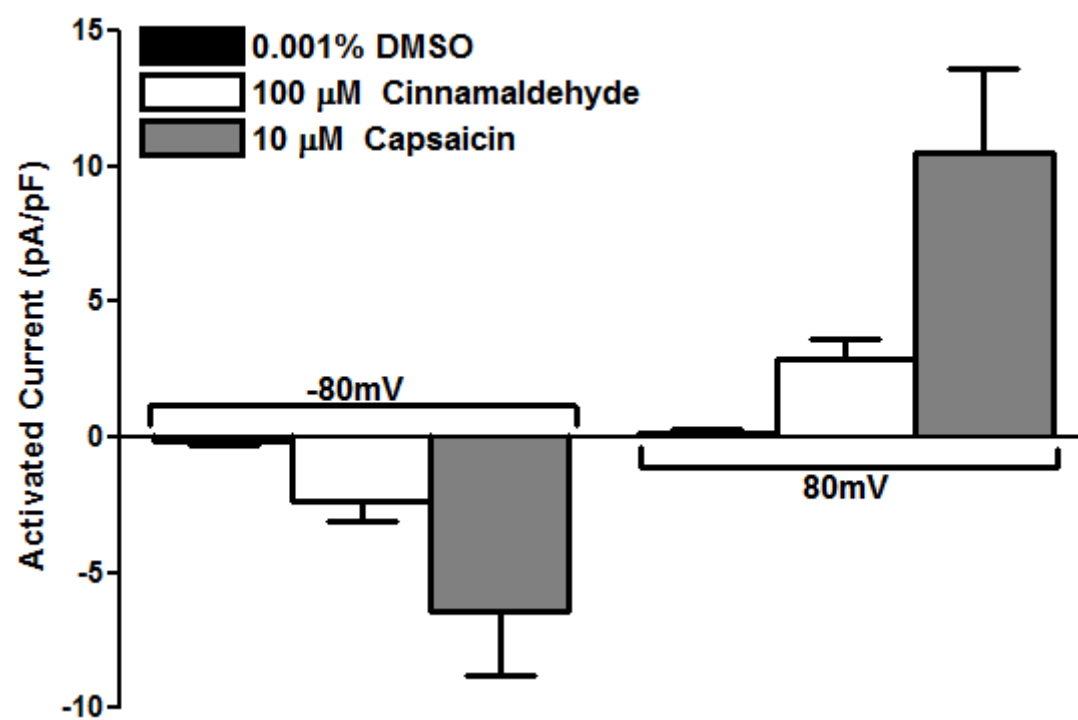

Figure S3

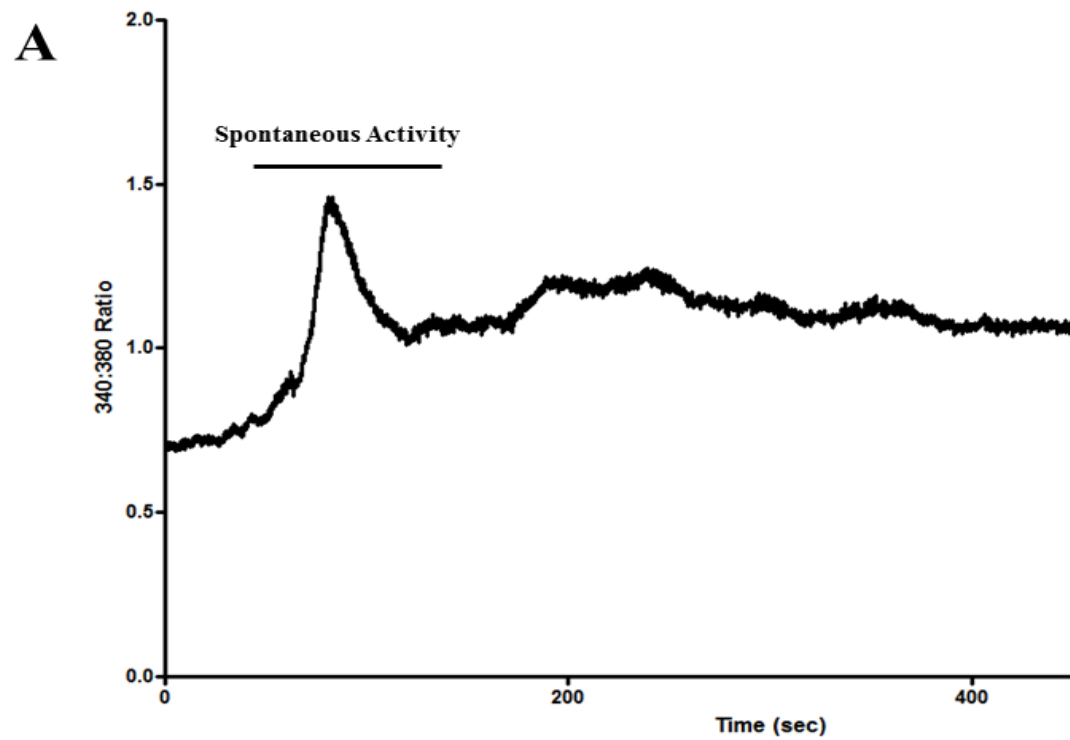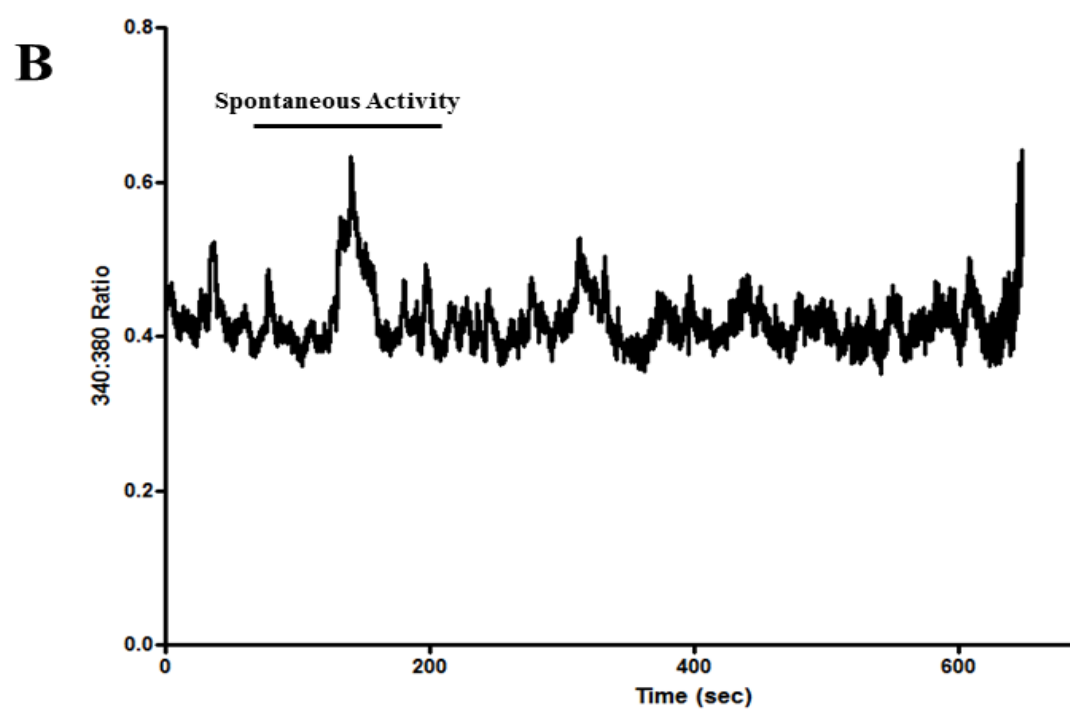

Figure S4

A

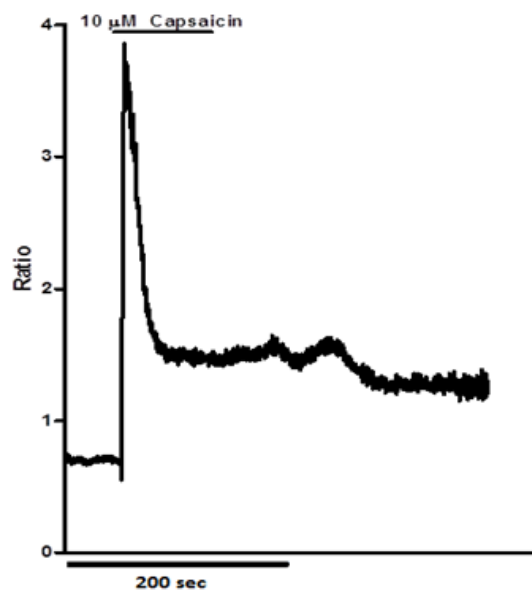

B

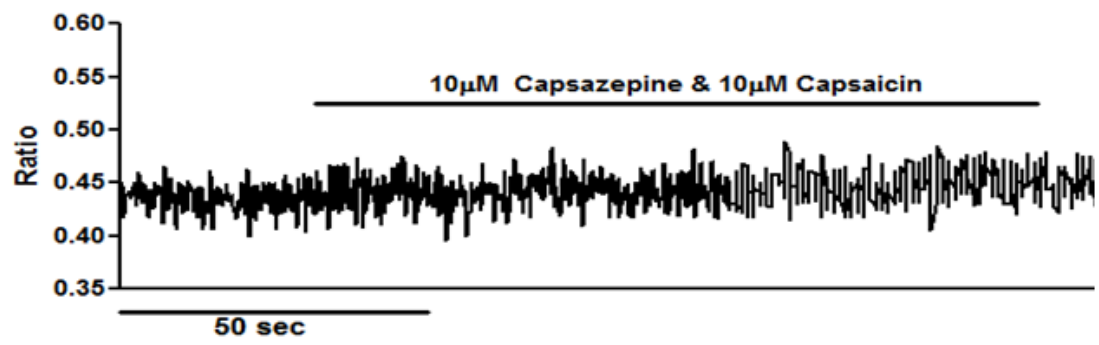

C

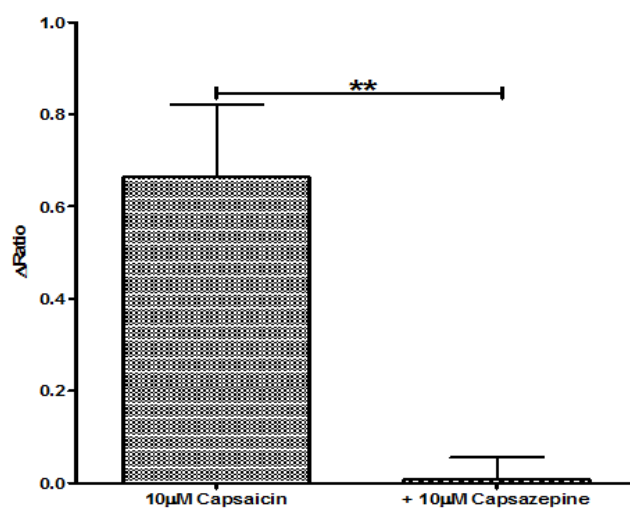

Figure S5

**A**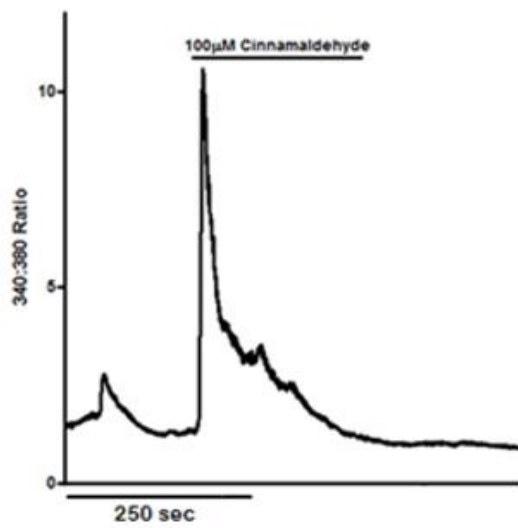**B**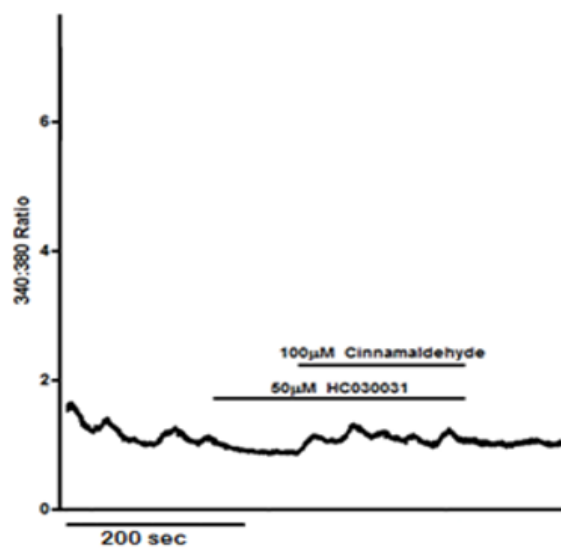**C**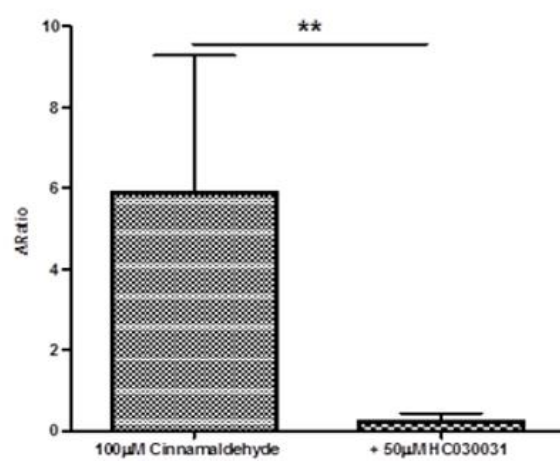

Figure S6

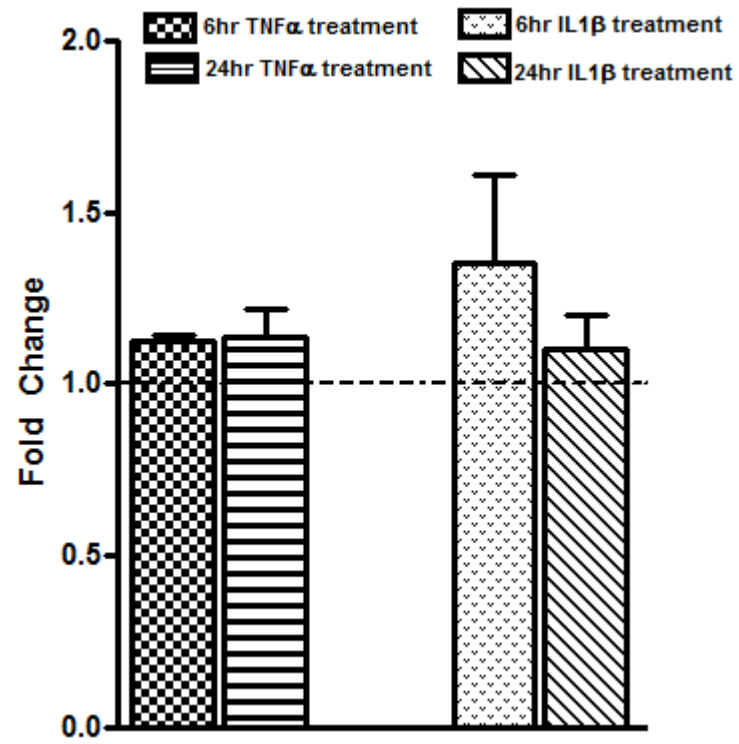

Figure S7



**A**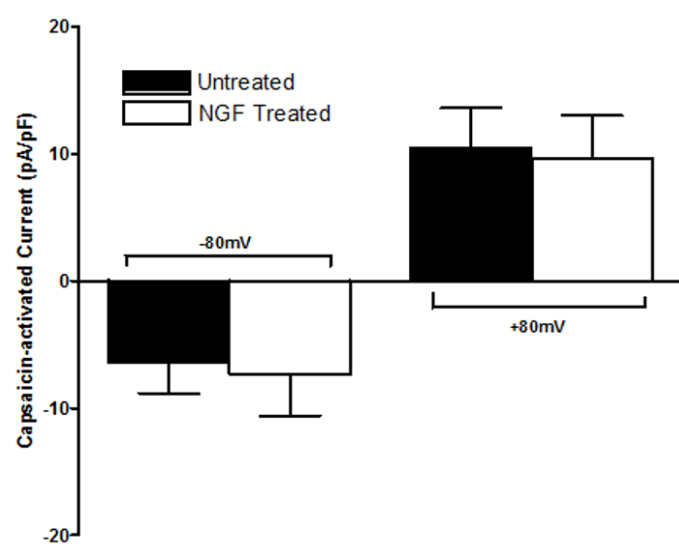**B**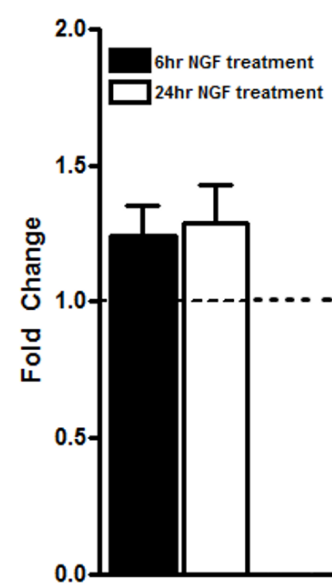

**Figure S8**

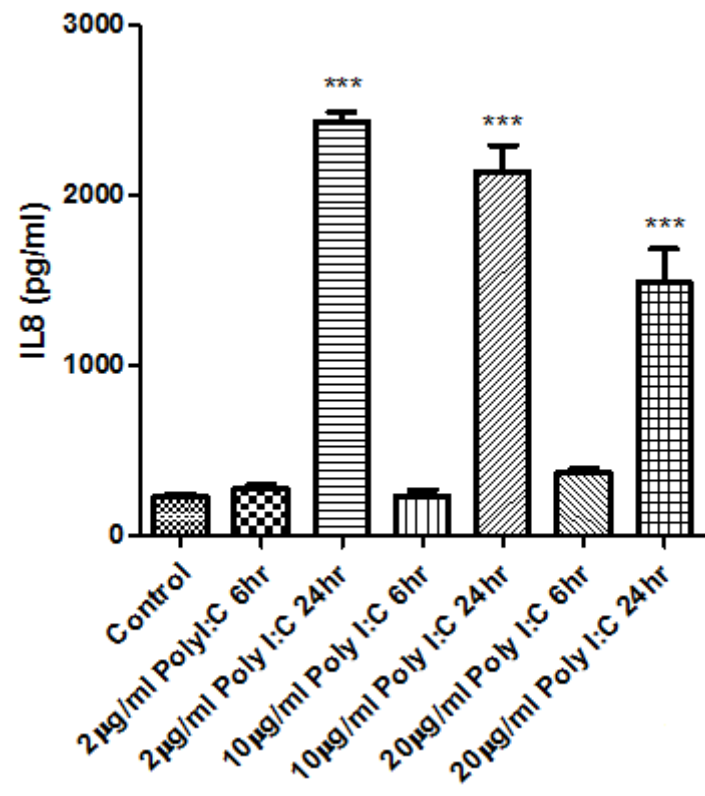

Figure S9
